# Supplementary material
Source: MDPI journal article supplement (https://www.mdpi.com/1999-4907/13/5/724)
Supplement: s1 [file s1]

## Supplementary material

**Table S1.** List of tree species, summarized under the general term “others”.

| Species List              |                |                          |                   |                            |                |
|---------------------------|----------------|--------------------------|-------------------|----------------------------|----------------|
| <i>Picea abies</i>        | Norway spruce  | <i>Ulmus glabra</i>      | Mountain elm      | <i>Alnus viridis</i>       | green alder    |
| <i>Abies alba</i>         | Silver fir     | <i>Ulmus minor</i>       | Field elm         | <i>Populus nigra</i>       | black poplar   |
| <i>Larix decidua</i>      | European larch | <i>Sorbus terminalis</i> | Wild service tree | <i>Populus tremula</i>     | aspen          |
| <i>Quercus rubra</i>      | Red oak        | <i>Prunus avium</i>      | Cherry tree       | <i>Salix spec.</i>         | willow         |
| <i>Sorbus domestica</i>   | Spearling      | <i>Sorbus aucuparia</i>  | Mountain ash      | <i>Acer pseudoplatanus</i> | Sycamore maple |
| <i>Fraxinus excelsior</i> | Common ash     | <i>Alnus spec.</i>       | Alder             | <i>Acer platanoides</i>    | Norway maple   |
| <i>Betula spec.</i>       | birch          | <i>Alnus glutinosa</i>   | red alder         | <i>Acer campestre</i>      | Field maple    |
| <i>Tilia spec.</i>        | lime           | <i>Alnus incana</i>      | white alder       | <i>Taxus baccata</i>       | yew            |

**Table S2.** Variance inflation factors (VIF) for the linear mixed effects models (eq. 8–11).

| model 1 (eq. 8) |      | model 2 (eq. 9) |      | model 3 (eq. 10)  |      | model 4 (eq. 11) |      |
|-----------------|------|-----------------|------|-------------------|------|------------------|------|
| Predictor       | VIF  | Predictor       | VIF  | Predictor         | VIF  | Predictor        | VIF  |
| ln(V)           | 3.68 | ln(V)           | 3.61 | ln(Age)           | 3.96 | Age              | 2.56 |
| ln(SDI)         | 2.32 | ln(SI)          | 1.44 | rel_d             | 3.38 | MT               | 1.41 |
| Age             | 2.27 | Age             | 2.49 | MT                | 1.96 | ln(SDI)          | 2.70 |
| MT              | 1.39 | ln(SDI)         | 4.56 | cvh               | 5.79 | Age x MT         | 3.49 |
| Year            | 4.32 | MT              | 1.41 | ln(SDI)           | 3.14 | Age x ln(SDI)    | 1.71 |
| MT x Year       | 3.21 | Lay             | 1.14 | ln(Age) x rel_d   | 1.35 | MT x ln(SDI)     | 2.31 |
|                 |      | Age x ln(SDI)   | 1.54 | ln(Age) x MT      | 4.53 |                  |      |
|                 |      | ln(SDI) x MT    | 2.38 | ln(Age) x cvh     | 2.30 |                  |      |
|                 |      | ln(SDI) x Lay   | 1.79 | ln(Age) x ln(SDI) | 1.44 |                  |      |
|                 |      |                 |      | rel_d x MT        | 4.21 |                  |      |
|                 |      |                 |      | rel_d x cvh       | 1.68 |                  |      |
|                 |      |                 |      | rel_d x ln(SDI)   | 1.36 |                  |      |
|                 |      |                 |      | MT x h            | 3.80 |                  |      |
|                 |      |                 |      | MT x ln(SDI)      | 3.20 |                  |      |
|                 |      |                 |      | cvh x MT          | 2.37 |                  |      |

**Table S3.** Results of the linear mixed effects model for species-specific Growth Dominance Coefficients. \*\*\* <0.001.

|                 | est     | se     | p-value | sig. | random effects              | sd        |
|-----------------|---------|--------|---------|------|-----------------------------|-----------|
|                 | 0.0661  | 0.0118 | 0.000   | ***  | <i>b<sub>j</sub></i>        | 0.02      |
| Age             | −0.0004 | 0.0001 | 0.000   | ***  | <i>b<sub>jt</sub></i>       | 0.02      |
| oak [mix]       | 0.0130  | 0.0160 | 0.416   | ns   | <i>ε<sub>ijt</sub></i>      | 0.08      |
| beech           | 0.0321  | 0.0182 | 0.078   | .    |                             |           |
| hornbeam        | −0.0351 | 0.0245 | 0.153   | ns   | n obs                       | 1612      |
| pine            | 0.0428  | 0.0503 | 0.396   | ns   | pseudo-R <sup>2</sup> (m/c) | 0.12/0.24 |
| others          | 0.0284  | 0.0269 | 0.291   | ns   | RMSE                        | 0.07      |
| Age x oak [mix] | −0.0001 | 0.0001 | 0.654   | ns   |                             |           |
| Age x beech     | −0.0006 | 0.0002 | 0.000   | ***  |                             |           |
| Age x hornbeam  | 0.0004  | 0.0002 | 0.098   | ns   |                             |           |
| Age x pine      | −0.0002 | 0.0004 | 0.649   | ns   |                             |           |
| Age x others    | 0.0001  | 0.0003 | 0.722   | ns   |                             |           |

**Table S4.** Results of the generalized additive mixed model (GAMM) to represent stand productivity as a function of tree species proportions of oak and beech. \*\*\* <0.001.

|                                                     | <b>est</b> | <b>se</b> | <b>p-value</b> | <b>sig.</b> |                      |      |
|-----------------------------------------------------|------------|-----------|----------------|-------------|----------------------|------|
|                                                     | 0.705      | 0.14      | 0.000          | ***         | <b>n obs</b>         | 480  |
| <b>ln(V)</b>                                        | 0.700      | 0.02      | 0.000          | ***         | <b>R<sup>2</sup></b> | 0.69 |
| <b>ln(A)</b>                                        | −0.560     | 0.04      | 0.000          | ***         | <b>RMSE</b>          | 0.28 |
|                                                     | <b>Edf</b> |           | <b>p-Wert</b>  | <b>sig</b>  |                      |      |
| <b>f(Prop<sub>Oak</sub> x Prop<sub>Beech</sub>)</b> | 4.700      |           | 0.000          | ***         |                      |      |
